# Supplementary figures and images for: Sex differences in renal angiotensin converting enzyme 2 (ACE2) activity are 17β-oestradiol-dependent and sex chromosome-independent
Source: Springer Nature journal article supplement (doi:10.1186/2042-6410-1-6), 2010-11-05

**Angiotensinogen**

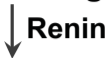

**Angiotensin I**  
(D-R-V-Y-I-H-P-F-H-L)

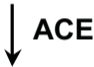

**Angiotensin II**  
(D-R-V-Y-I-H-P-F)

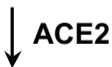

**Angiotensin (1-7)**  
(D-R-V-Y-I-H-P)

Supplement: 13293_2010_6_MOESM1_ESM.pdf [file 13293_2010_6_MOESM1_ESM.pdf]
